# Supplementary material for: Analytical Modeling in Applied Electromagnetics
Source: Hindawi journal article supplement (doi:10.1155/2017/6034692), 2003-06-30

**A**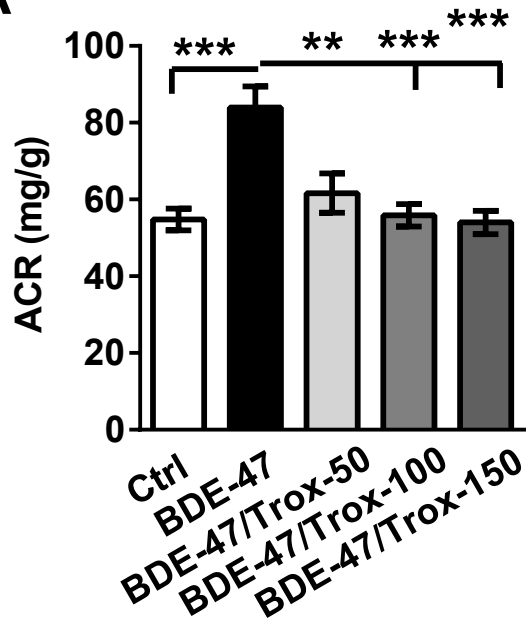**B**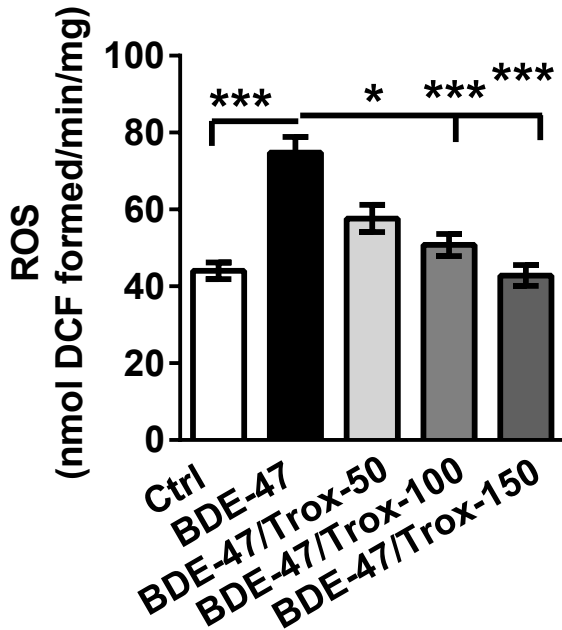

Supplement: f3 [file 6034692.f3.pdf]
